# Supplementary material for: The microbiome structure of decomposing plant leaves in soil depends on plant species, soil pore sizes, and soil moisture content
Source: PubMed Central journal article supplement (PMC10461183; doi:10.3389/fmicb.2023.1172862), 2023-08-14
Supplement: Image_2.pdf [file Image_2.pdf]

# Microbiome Composition Without Control Samples

**A****Fungi**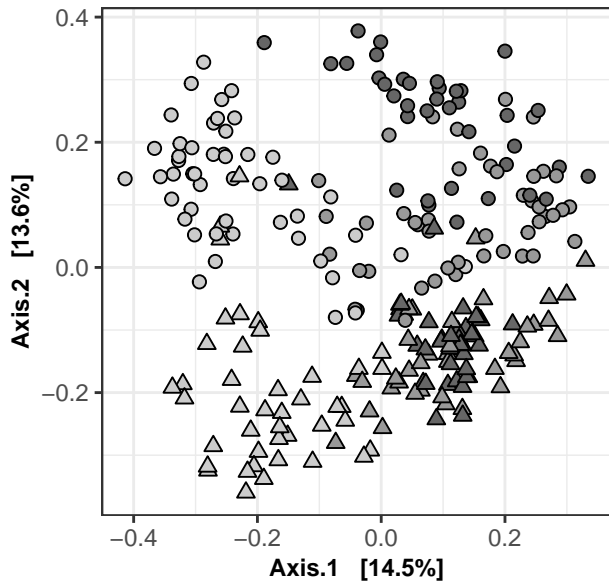**B****Bacteria**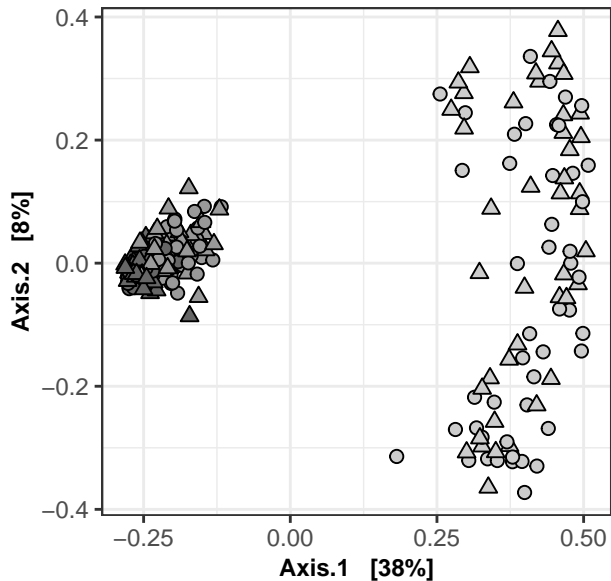

**Niche** □ Leaf ■ Nearsoil ■ Farsoil

**Treatment** ○ T1 △ T4
