# Supplementary material for: The microbiome structure of decomposing plant leaves in soil depends on plant species, soil pore sizes, and soil moisture content
Source: PubMed Central journal article supplement (PMC10461183; doi:10.3389/fmicb.2023.1172862), 2023-08-14
Supplement: Image_3.pdf [file Image_3.pdf]

# Bacterial Shannon Index

**A**

**T1**

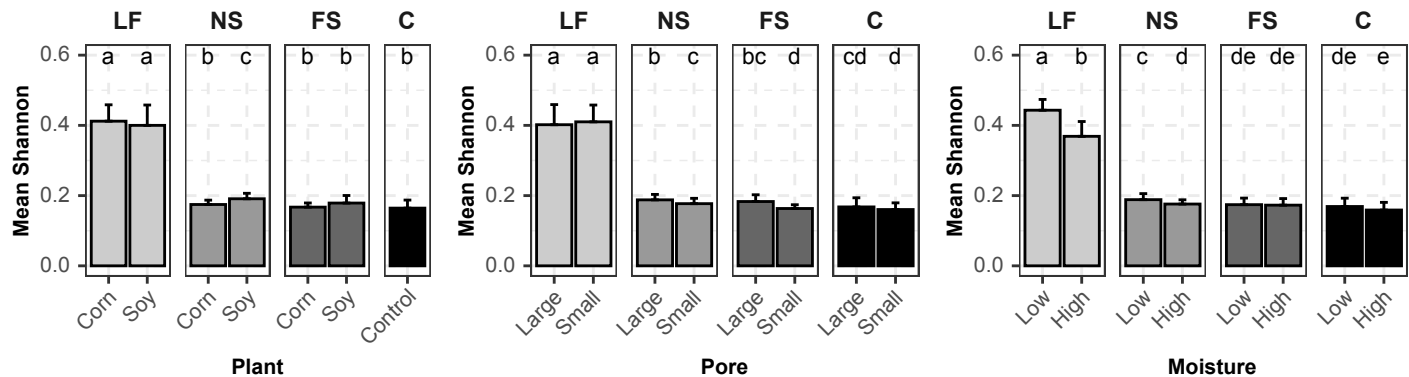

**B**

**T4**

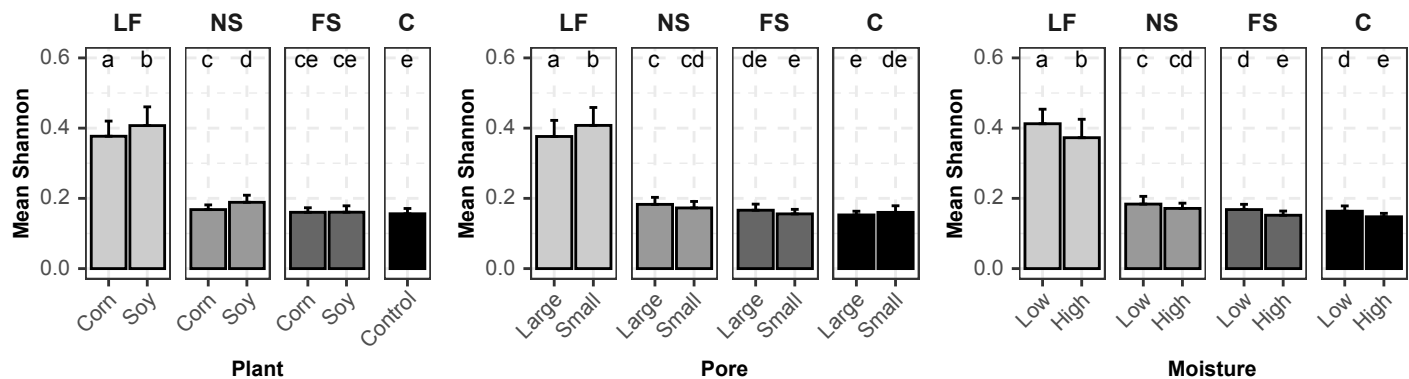

LF = Leaf 
  NS = Nearsoil 
  FS = Farsoil 
  C = Control
