# Supplementary material for: The microbiome structure of decomposing plant leaves in soil depends on plant species, soil pore sizes, and soil moisture content
Source: PubMed Central journal article supplement (PMC10461183; doi:10.3389/fmicb.2023.1172862), 2023-08-14
Supplement: Image_4.pdf [file Image_4.pdf]

# Fungal Shannon Index

**A**

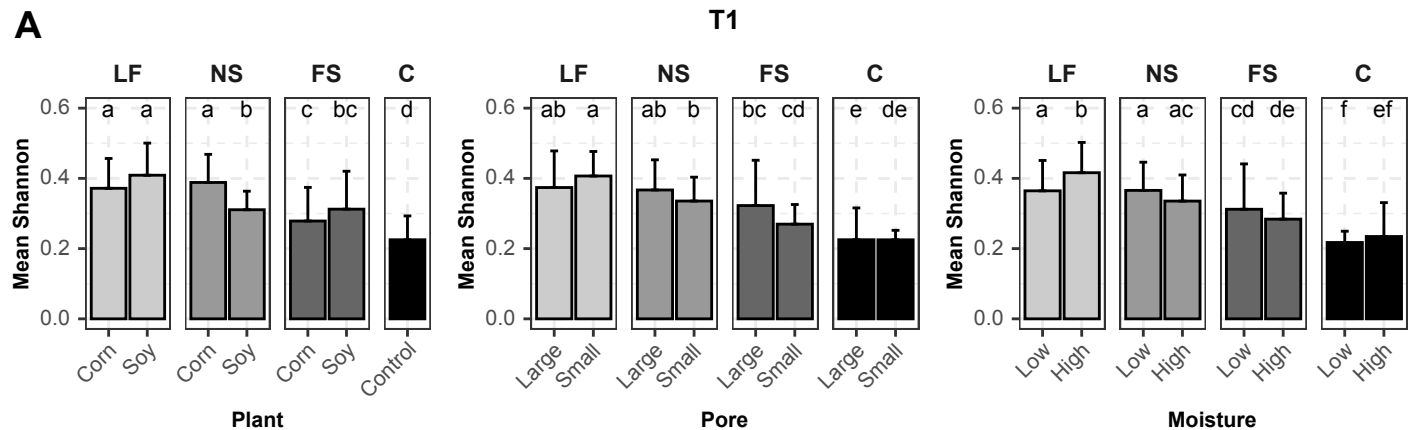

**B**

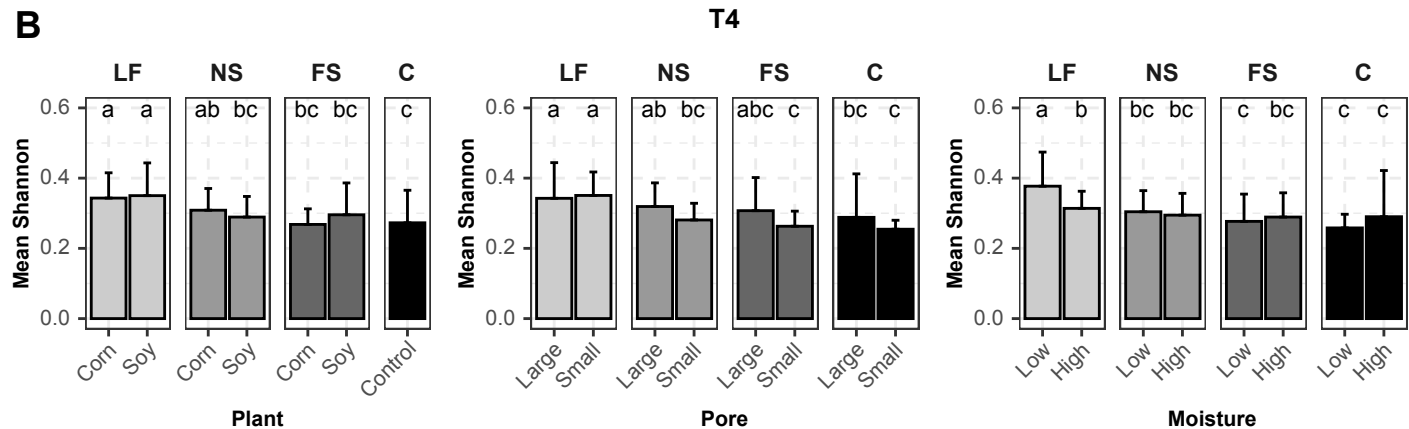

LF = Leaf 
  NS = Nearsoil 
  FS = Farsoil 
  C = Control
