# Supplementary material for: The microbiome structure of decomposing plant leaves in soil depends on plant species, soil pore sizes, and soil moisture content
Source: PubMed Central journal article supplement (PMC10461183; doi:10.3389/fmicb.2023.1172862), 2023-08-14
Supplement: Table_1.pdf [file Table_1.pdf]

*Permanova**Betadisper*

| <b>Fungi</b>          | <b>Df</b> | <b>Sum.Sq</b> | <b>F</b> | <b>R<sup>2</sup></b> | <b>P.adj</b>  |
|-----------------------|-----------|---------------|----------|----------------------|---------------|
| <i>Pore</i>           | 1         | 0.1057        | 1.0322   | 0.0623               | 0.3606        |
| <i>Treatment</i>      | 1         | 0.7000        | 6.8328   | 0.4122               | <b>0.0016</b> |
| <i>Pore:Treatment</i> | 1         | 0.0730        | 0.7126   | 0.0430               | 0.6566        |

| <b>Sum.Sq</b> | <b>F</b> | <b>P.adj</b>  |
|---------------|----------|---------------|
| 0.2160        | 40.0528  | <b>0.0001</b> |
| 0.0332        | 3.9210   | 0.0486        |
| -             | -        | -             |

**Bacteria**

|                       |   |        |        |        |               |
|-----------------------|---|--------|--------|--------|---------------|
| <i>Pore</i>           | 1 | 0.1030 | 1.1592 | 0.0973 | 0.1591        |
| <i>Treatment</i>      | 1 | 0.1704 | 1.9181 | 0.1610 | <b>0.0010</b> |
| <i>Pore:Treatment</i> | 1 | 0.0743 | 0.8360 | 0.0702 | 0.8808        |

|        |        |        |
|--------|--------|--------|
| 0.0069 | 0.2548 | 0.6115 |
| 0.0184 | 0.6662 | 0.4114 |
| -      | -      | -      |
