# Supplementary material for: The microbiome structure of decomposing plant leaves in soil depends on plant species, soil pore sizes, and soil moisture content
Source: PubMed Central journal article supplement (PMC10461183; doi:10.3389/fmicb.2023.1172862), 2023-08-14
Supplement: Table_2.pdf [file Table_2.pdf]

*Permanova**Betadisper*

| <b>Fungi</b>                         | <b>Df</b> | <b>Sum.Sq</b> | <b>F</b> | <b>R<sup>2</sup></b> | <b>P.adj</b> | <b>Sum.Sq</b> | <b>F</b> | <b>P.adj</b>  |
|--------------------------------------|-----------|---------------|----------|----------------------|--------------|---------------|----------|---------------|
| <i>Slice</i>                         | 2         | 9.619         | 36.310   | 0.160                | <b>0.003</b> | 0.0848        | 6.7032   | <b>0.0015</b> |
| <i>Treatment</i>                     | 1         | 6.534         | 49.327   | 0.109                | <b>0.003</b> | 0.0112        | 1.5327   | 0.2169        |
| <i>Plant</i>                         | 1         | 2.343         | 17.688   | 0.039                | <b>0.003</b> | 0.0014        | 0.2361   | 0.6275        |
| <i>Pore</i>                          | 1         | 1.605         | 12.115   | 0.027                | <b>0.003</b> | 0.1472        | 28.5655  | <b>0.0000</b> |
| <i>Moisture</i>                      | 1         | 0.636         | 4.802    | 0.011                | <b>0.003</b> | 0.0108        | 2.0232   | 0.1562        |
| <i>Slice:Plant</i>                   | 2         | 2.201         | 8.307    | 0.037                | <b>0.003</b> | -             | -        | -             |
| <i>Slice:Treatment</i>               | 2         | 1.709         | 6.451    | 0.028                | <b>0.003</b> | -             | -        | -             |
| <i>Slice:Moisture</i>                | 2         | 0.912         | 3.445    | 0.015                | <b>0.003</b> | -             | -        | -             |
| <i>Slice:Pore</i>                    | 2         | 0.863         | 3.257    | 0.014                | <b>0.003</b> | -             | -        | -             |
| <i>Treatment:Pore</i>                | 1         | 0.533         | 4.023    | 0.009                | <b>0.003</b> | -             | -        | -             |
| <i>Treatment:Plant:Pore:Moisture</i> | 1         | 0.436         | 3.292    | 0.007                | <b>0.003</b> | -             | -        | -             |

**Bacteria**

|                        |   |        |         |       |              |         |          |               |
|------------------------|---|--------|---------|-------|--------------|---------|----------|---------------|
| <i>Slice</i>           | 2 | 24.212 | 122.342 | 0.387 | <b>0.003</b> | 1.3344  | 428.8072 | <b>0.0000</b> |
| <i>Pore</i>            | 1 | 1.619  | 16.357  | 0.026 | <b>0.003</b> | 0.0080  | 0.3284   | 0.5671        |
| <i>Time</i>            | 2 | 1.482  | 7.499   | 0.024 | <b>0.003</b> | 0.00408 | 0.085069 | 0.9185        |
| <i>Moisture</i>        | 1 | 1.339  | 13.535  | 0.021 | <b>0.003</b> | 0.0010  | 0.0431   | 0.8357        |
| <i>Treatment</i>       | 1 | 1.282  | 12.951  | 0.021 | <b>0.003</b> | 0.0076  | 0.3064   | 0.5804        |
| <i>Plant</i>           | 1 | 0.885  | 8.944   | 0.014 | <b>0.003</b> | 0.0129  | 0.5573   | 0.4560        |
| <i>Slice:Moisture</i>  | 2 | 1.592  | 8.046   | 0.025 | <b>0.003</b> | -       | -        | -             |
| <i>Slice:Pore</i>      | 2 | 1.580  | 7.984   | 0.025 | <b>0.003</b> | -       | -        | -             |
| <i>Slice:Treatment</i> | 2 | 1.300  | 6.569   | 0.021 | <b>0.003</b> | -       | -        | -             |
| <i>Slice:Plant</i>     | 2 | 1.143  | 5.778   | 0.018 | <b>0.003</b> | -       | -        | -             |
| <i>Treatment:Pore</i>  | 1 | 0.437  | 4.419   | 0.007 | <b>0.042</b> | -       | -        | -             |
